# Supplementary material for: Hospital Volume Threshold Associated with Higher Survival after Endovascular Recanalization Therapy for Acute Ischemic Stroke
Source: PubMed Central journal article supplement — J Stroke. 2020 Jan 31;22(1):141–9. doi: 10.5853/jos.2019.00955 (PMC7005355; doi:10.5853/jos.2019.00955), 2020-01-31
Supplement: jos-2019-00955-suppl3.pdf [file jos-2019-00955-suppl3.pdf]

**Supplementary Table 1.** Seven parameters of stroke severity index and its explanation

| Descriptions               | Explanation                                                                                                                | Code system/Codes                                   |
|----------------------------|----------------------------------------------------------------------------------------------------------------------------|-----------------------------------------------------|
| Airway suctioning          | Suctioning of patient's airway in case of altered mental state /or undergoing anesthesia when patient had ERT procedure    | HIRA Code/M0135, M0137                              |
| Bacterial sensitivity test | Almost every patients who have shot intravenous antibiotics, they had this test                                            | HIRA Code/B40xx, B413xx, B414x                      |
| General ward stay          | Relatively mild stroke patients who admitted from emergency department usually go to general ward first                    | HIRA Code/ABxx                                      |
| ICU stay                   | Severe stroke patients who admitted from emergency department almost always go to ICU first                                | HIRA Code/AJxxx                                     |
| Nasogastric tube           | Severe stroke patients cannot eat orally by themselves, and this tube is usually inserted                                  | HIRA Code/Q2621, Q2622                              |
| Osmotherapy                | For severe stroke patient whose brain tissue damaged massively, usually osmotherapy prescribed to prevent brain herniation | Main Component Code/14800xBIJ, 148010BIJ, 148011BIJ |
| Urinary catheterization    | Severe stroke patient cannot walk by themselves and usually they void by urinary catheterization                           | HIRA Code/M0060                                     |

"x" means various numbers, from 1 to 9.

ERT, endovascular recanalization therapy; HIRA, Health Insurance Review and Assessment Service; ICU, intensive care unit.

**Supplementary Table 2.** Parameters for risk adjustment: individual and hospital level

| Fields                                                    | Name (ICD-10 codes)                                                                                                                                                                                                                                                                                                                                                                                                                                                                                                                                                                                                                                                                                                                                                                                                                                                                                                                                                                                                                                        |
|-----------------------------------------------------------|------------------------------------------------------------------------------------------------------------------------------------------------------------------------------------------------------------------------------------------------------------------------------------------------------------------------------------------------------------------------------------------------------------------------------------------------------------------------------------------------------------------------------------------------------------------------------------------------------------------------------------------------------------------------------------------------------------------------------------------------------------------------------------------------------------------------------------------------------------------------------------------------------------------------------------------------------------------------------------------------------------------------------------------------------------|
| Demographics                                              | Age, sex                                                                                                                                                                                                                                                                                                                                                                                                                                                                                                                                                                                                                                                                                                                                                                                                                                                                                                                                                                                                                                                   |
| Risk factor and modified Charlson comorbidity index items | AMI or CHD or CAD (I21, I22, I23, I34, I35)<br>Congestive heart failure (I50)<br>Peripheral vascular disease (I73)<br>Dementia (F00, F01, F02, F03)<br>Chronic obstructive pulmonary disease (J40, J41, J42, J43, J44)<br>Connective tissue disease (L94)<br>Peptic ulcer (K25, K26, K27)<br>Mild liver disease (K73, K74)<br>Diabetes mellitus (E10, E11, E12, E13, E14)<br>Diabetes with end organ disease (E13, E14)<br>Renal disease (N17, N18, N19)<br>Nonmetastatic solid tumor (C41, C46, C47, D00, D01, D02, D04, D05, D06, D07, D09)<br>Leukemia (C91, C92, C93, C94, C95)<br>Lymphoma and multiple myeloma (C81, C82, C83, c84, C85, C86, C90)<br>Metastatic tumor (C77, C78, C79)<br>AIDS (B20, B21, B22, B23, B34, R75)<br>Prior stroke (I63)<br>Transient ischemic attack (G45)<br>Hypertension (I10, I11, I12, I13, I15)<br>Atrial fibrillation (I48)<br>other cardiac disease: DCMP, valvular heart disease, PFO (I42.0, I05, Q21.10)<br>Extracranial arterial stenosis (I65)<br>Intracranial arterial stenosis (I66)<br>Dyslipidemia (E78) |
| Severity for ischemic stroke                              | Stroke severity index (no codes, modelled from other items)                                                                                                                                                                                                                                                                                                                                                                                                                                                                                                                                                                                                                                                                                                                                                                                                                                                                                                                                                                                                |
| Hospital level items                                      | Teaching hospital or not<br>Geographical location: whether in metropolitan city or not<br>Stroke unit or not<br>Public or private                                                                                                                                                                                                                                                                                                                                                                                                                                                                                                                                                                                                                                                                                                                                                                                                                                                                                                                          |

ICD-10, 10th revision of the International Statistical Classification of Diseases and Related Health Problems; AMI, acute myocardial infarction; CHD, coronary heart disease; CAD, coronary arterial disease; AIDS, acquired immune deficiency syndrome; DCMP, dilated cardiomyopathy; PFO, patent foramen ovale.
