# Supplementary material for: Hospital Volume Threshold Associated with Higher Survival after Endovascular Recanalization Therapy for Acute Ischemic Stroke
Source: PubMed Central journal article supplement — J Stroke. 2020 Jan 31;22(1):141–9. doi: 10.5853/jos.2019.00955 (PMC7005355; doi:10.5853/jos.2019.00955), 2020-01-31
Supplement: jos-2019-00955-suppl7.pdf [file jos-2019-00955-suppl7.pdf]

**Supplementary Table 3.** Regression statistics of stroke severity index model

| Statistic                                   | Value |
|---------------------------------------------|-------|
| Multiple regression correlation coefficient | 0.70  |
| R square                                    | 0.49  |
| Adjusted R square                           | 0.49  |
| Standard error                              | 4.52  |
| Observations                                | 3.13  |

**Supplementary Table 4.** Multiple linear regression model for the stroke severity index (regression coefficient was 0.685)

| Variable                   | Coefficient | Standard error | P      |
|----------------------------|-------------|----------------|--------|
| Airway suctioning          | 3.7345      | 0.353          | <0.001 |
| Bacterial sensitivity test | 1.1990      | 0.289          | <0.001 |
| General ward stay          | -2.9088     | 0.224          | <0.001 |
| ICU stay                   | -0.1125     | 0.322          | 0.519  |
| Nasogastric intubation     | 3.4404      | 0.174          | <0.001 |
| Osmotherapy                | 1.8908      | 0.262          | <0.001 |
| Urinary catheterization    | 2.7366      | 0.305          | <0.001 |
| Constant                   | 5.8726      | 0.234          | <0.001 |

ICU, intensive care unit.

**Supplementary Table 5.** Characteristics of the patients in clinical databases (n=4,932)

| Characteristic | DAUH (n=3,176) | PNUYH (n=1,756) | P      |
|----------------|----------------|-----------------|--------|
| Age            | 67.2±12.6      | 70.0±12.9       | <0.001 |
| Female sex     | 1,243 (39.7)   | 713 (40.5)      | 0.557  |
| NIHSS          | 4 (1–10)       | 4 (1–9)         | 0.181  |
| LOS            | 7 (4–11)       | 9 (6–14)        | <0.001 |

Values are presented as mean±standard deviation, number (%), or median (interquartile range).

DAUH, Dong-A University Hospital; PNUYH, Pusan National University Yangsan Hospital; NIHSS, National Institutes of Health Stroke Scale; LOS, length of stay.

**Supplementary Table 6.** Comparison of the clinical and administrative databases (n=4,932)

| Variable                      | DAUH | PNUYH | Overall |
|-------------------------------|------|-------|---------|
| Sensitivity (%)               | 97.2 | 73.2  | 83.2    |
| Specificity (%)               | 98.5 | 99.3  | 98.8    |
| Positive predictive value (%) | 70.5 | 92    | 80.2    |

DAUH, Dong-A University Hospital; PNUYH, Pusan National University Yangsan Hospital.
