# Supplementary material for: Hospital Volume Threshold Associated with Higher Survival after Endovascular Recanalization Therapy for Acute Ischemic Stroke
Source: PubMed Central journal article supplement — J Stroke. 2020 Jan 31;22(1):141–9. doi: 10.5853/jos.2019.00955 (PMC7005355; doi:10.5853/jos.2019.00955), 2020-01-31
Supplement: jos-2019-00955-suppl8.pdf [file jos-2019-00955-suppl8.pdf]

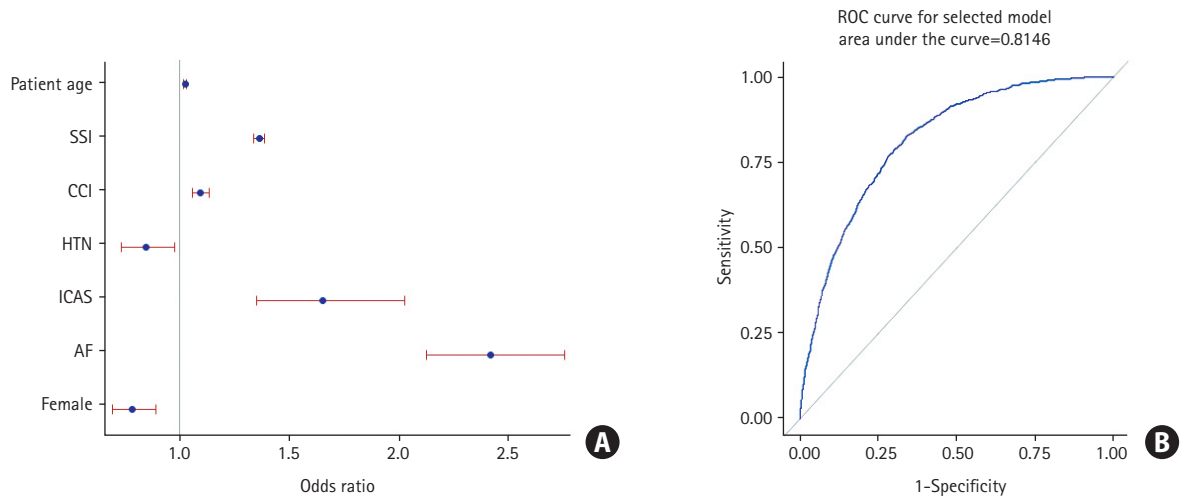

**Supplementary Figure 1.** (A) Selected risk adjustment variables of 30-day mortality models with each odds ratios and 95% confidence intervals and (B) receiver operating characteristic (ROC) curve. SSI, stroke severity index; CCI, Charlson comorbidity index; HTN, hypertension; ICAS, intracranial arterial stenosis; AF, atrial fibrillation.

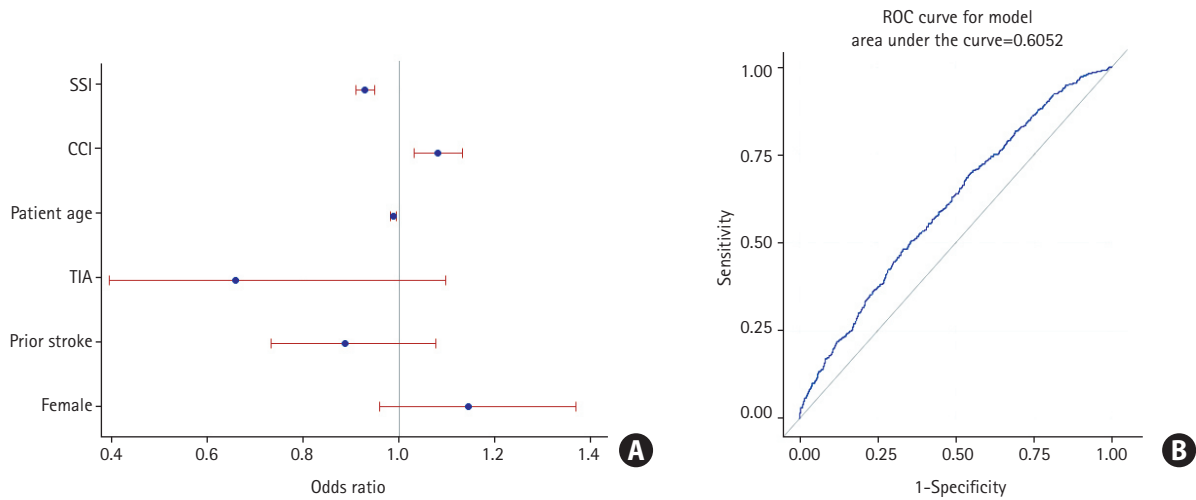

**Supplementary Figure 2.** (A) Selected risk adjustment variables of 30-day readmission models with each odds ratios and 95% confidence intervals and (B) receiver operating characteristic (ROC) curve. SSI, stroke severity index; CCI, Charlson comorbidity index; TIA, transient ischemic attack.
