# Supplementary material for: Hospital Volume Threshold Associated with Higher Survival after Endovascular Recanalization Therapy for Acute Ischemic Stroke
Source: PubMed Central journal article supplement — J Stroke. 2020 Jan 31;22(1):141–9. doi: 10.5853/jos.2019.00955 (PMC7005355; doi:10.5853/jos.2019.00955), 2020-01-31
Supplement: jos-2019-00955-suppl10.pdf [file jos-2019-00955-suppl10.pdf]

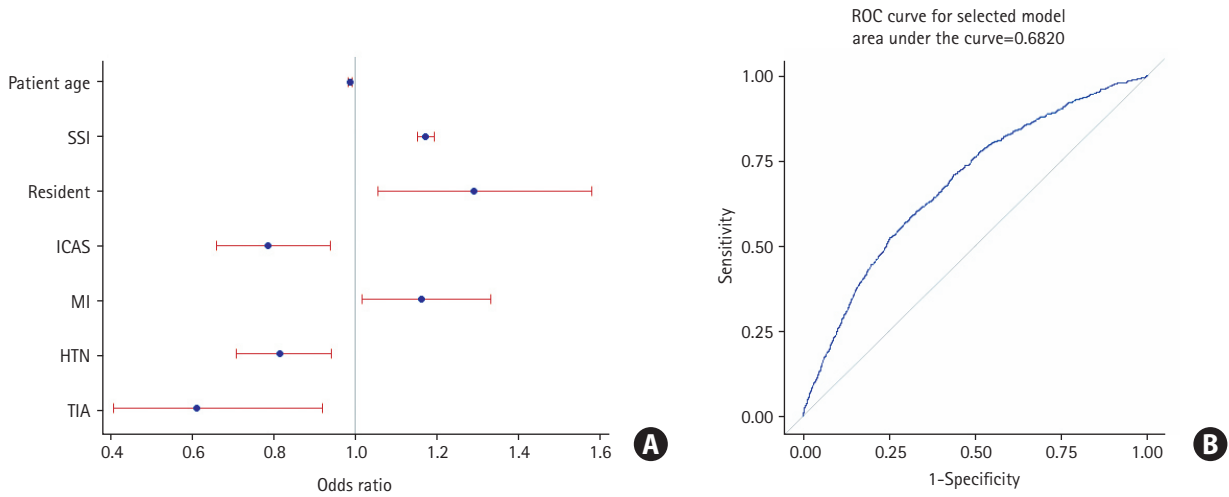

**Supplementary Figure 3.** (A) Selected risk adjustment variables of symptomatic intracerebral hemorrhage models with each odds ratios and 95% confidence intervals and (B) receiver operating characteristic (ROC) curve. SSI, stroke severity index; ICAS, intracranial arterial stenosis; MI, myocardial infarction; HTN, hypertension; TIA, transient ischemic attack.

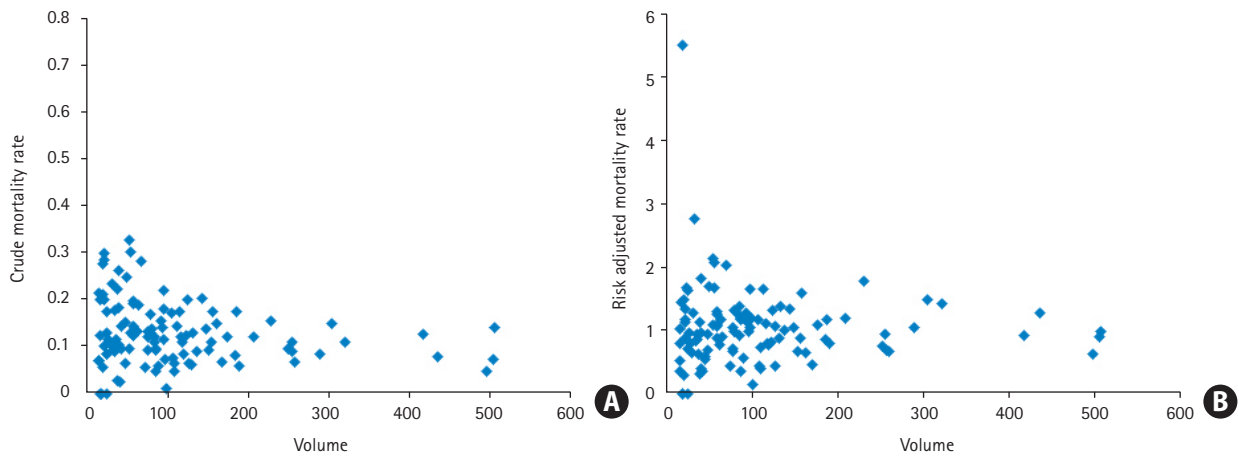

**Supplementary Figure 4.** Plotted graphs of hospital crude (A) and risk-adjusted (B) 30-day mortality rate and endovascular recanalization therapy volumes for 5 years (n=111). Pearson correlation coefficient of  $-0.21$  ( $P=0.03$ ). However, in the risk-adjusted 30-day mortality model, the correlation coefficient was  $-0.03$  ( $P=0.71$ ).
