# Supplementary material for: Hospital Volume Threshold Associated with Higher Survival after Endovascular Recanalization Therapy for Acute Ischemic Stroke
Source: PubMed Central journal article supplement — J Stroke. 2020 Jan 31;22(1):141–9. doi: 10.5853/jos.2019.00955 (PMC7005355; doi:10.5853/jos.2019.00955), 2020-01-31
Supplement: jos-2019-00955-suppl12.pdf [file jos-2019-00955-suppl12.pdf]

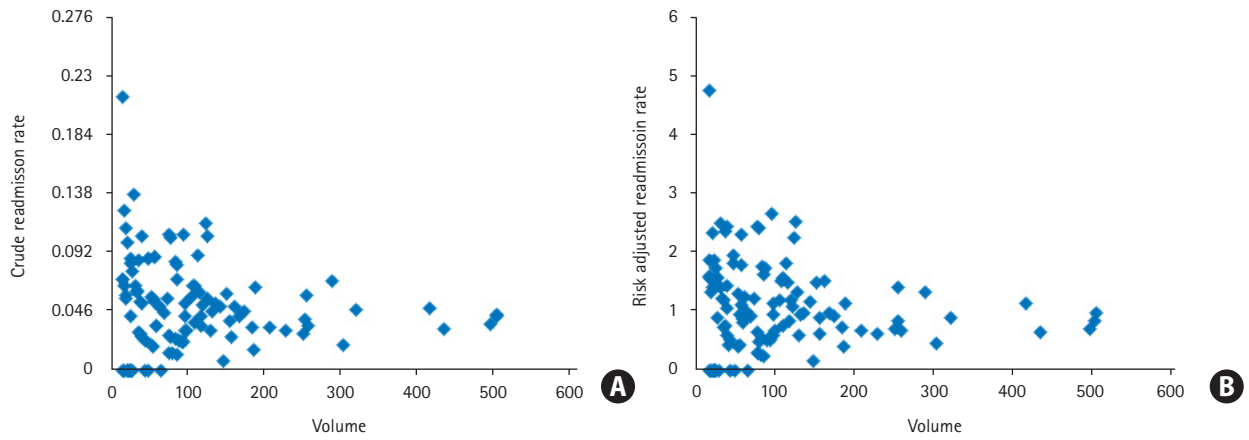

**Supplementary Figure 5.** Plotted graphs of hospital crude (A) and risk-adjusted (B) 30-day readmission rate and endovascular recanalization therapy volumes for 5 years (n=111). Both crude ( $-0.13$ ) and risk-adjusted ( $-0.15$ ) models showed a negative correlation. Both models showed statistically insignificant values ( $P=0.20$  and  $P=0.14$ ).

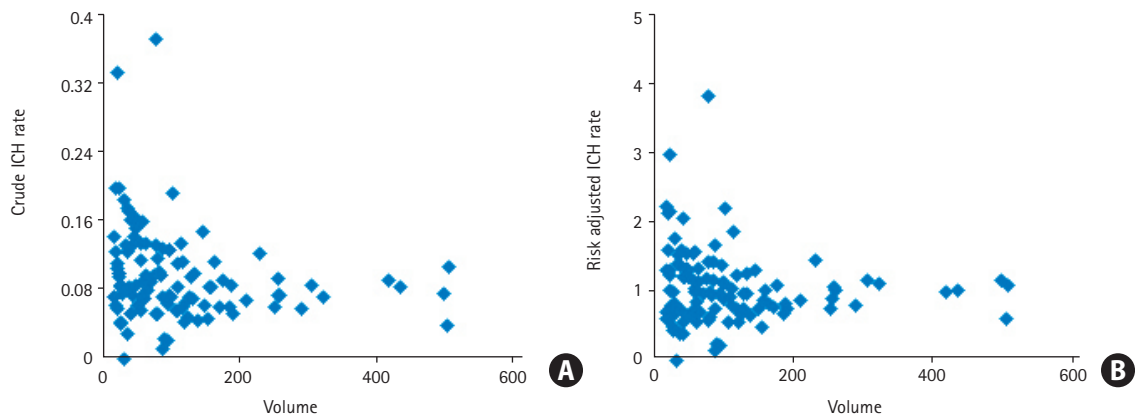

**Supplementary Figure 6.** Plotted graphs of hospital crude (A) and risk adjusted (B) symptomatic intracranial hemorrhage rate and endovascular recanalization therapy volumes for 5 years (n=111). Both crude and risk-adjusted models showed a negative correlation ( $-0.16$  and  $0.03$ ) and were statistically insignificant ( $P=0.11$  and  $P=0.73$ ).
